# Supplementary material for: Meta-analysis of brain iron levels of Parkinson’s disease patients determined by postmortem and MRI measurements
Source: PubMed Central journal article supplement (PMC5101491; doi:10.1038/srep36669), 2016-11-09
Supplement: srep36669-s1.pdf [file srep36669-s1.pdf]

## Meta-analysis of brain iron levels of Parkinson's disease patients determined by postmortem and MRI measurements

Jian-Yong Wang<sup>a,b,\*</sup>, Qing-Qing Zhuang<sup>a,\*</sup>, Lan-Bing Zhu<sup>a</sup>, Hui Zhu<sup>a</sup>, Ting Li<sup>a</sup>, Rui Li<sup>b</sup>, Song-Fang Chen<sup>a</sup>, Chen-Ping Huang<sup>b,#</sup>, Xiong Zhang<sup>a,#</sup>, Jian-Hong Zhu<sup>b,c,#</sup>

Supplementary Table S1. The disease comorbidity and diagnostic performance of the included 33 studies

| Article                                   | PD patients                                                                                                                                                                                                  | Controls                                                                                                                                                                                                                                                                                                                                                    |
|-------------------------------------------|--------------------------------------------------------------------------------------------------------------------------------------------------------------------------------------------------------------|-------------------------------------------------------------------------------------------------------------------------------------------------------------------------------------------------------------------------------------------------------------------------------------------------------------------------------------------------------------|
| Yu et al., 2013 <sup>17</sup>             | NM                                                                                                                                                                                                           | No neurologic or psychiatric disease                                                                                                                                                                                                                                                                                                                        |
| Loeffler et al., 1995 <sup>12</sup>       | NM                                                                                                                                                                                                           | Other than CNS disease and lacking any form of pathology at autopsy                                                                                                                                                                                                                                                                                         |
| Griffiths et al., 1993 <sup>11</sup>      | NM                                                                                                                                                                                                           | No neurologic or psychiatric disease                                                                                                                                                                                                                                                                                                                        |
| Dexter et al., 1989 <sup>2</sup>          | NM                                                                                                                                                                                                           | No neurologic or psychiatric disease                                                                                                                                                                                                                                                                                                                        |
| Riederer et al., 1989 <sup>4</sup>        | NM                                                                                                                                                                                                           | Heart failure (2), lung embolism (1), and labile hypertension (1)                                                                                                                                                                                                                                                                                           |
| Sofic et al., 1988 <sup>13</sup>          | Bronchopneumonia (6), pulmonary embolism after leg vein thrombosis and hypertensive heart disease (1), and cardiac arrest after colon carcinoma (1)                                                          | Died without any evidence of neurological or psychiatric disease. Bronchopneumonia (2), myocardial infarction (1), pulmonary thromboembolism and arteriosclerotic cerebrovascular disease (1), coronary arteriosclerosis and old infarction (1), coronary thrombosis (1), cor pulmonale, chronic bronchitis and emphysema (1), and pleural mesothelioma (1) |
| Visanji et al., 2013 <sup>15</sup>        | NM                                                                                                                                                                                                           | NM                                                                                                                                                                                                                                                                                                                                                          |
| Wypijewska et al., 2010 <sup>16</sup>     | Died at advanced stages of the disease                                                                                                                                                                       | No neurological diseases (myocardial infarct in most cases)                                                                                                                                                                                                                                                                                                 |
| Galazka-Friedm et al., 1996 <sup>10</sup> | Unrelated to the neurological disease (pneumonia, heart disease).                                                                                                                                            | Died without any symptoms of an extrapyramidal disease                                                                                                                                                                                                                                                                                                      |
| Uitti et al., 1989 <sup>14</sup>          | NM                                                                                                                                                                                                           | NM                                                                                                                                                                                                                                                                                                                                                          |
| Chen et al., 1993 <sup>9</sup>            | NM                                                                                                                                                                                                           | NM                                                                                                                                                                                                                                                                                                                                                          |
| Gorell et al., 1995 <sup>18</sup>         | Absence of either neuroleptic drug intake or a CNS disorder with Parkinson-like and other neurologic deficits (e.g. cerebellar, corticospinal, amyotrophic, autonomic, or supranuclearophthalmoplegic signs) | Free of CNS disease                                                                                                                                                                                                                                                                                                                                         |
| Graham et al., 2000 <sup>19</sup>         | NM                                                                                                                                                                                                           | Volunteer or spouses of patients with                                                                                                                                                                                                                                                                                                                       |

|                                     |                                                                                                                                                                                                                                                                                                                                                 |                                                                                                                                                                                              |
|-------------------------------------|-------------------------------------------------------------------------------------------------------------------------------------------------------------------------------------------------------------------------------------------------------------------------------------------------------------------------------------------------|----------------------------------------------------------------------------------------------------------------------------------------------------------------------------------------------|
|                                     |                                                                                                                                                                                                                                                                                                                                                 | Parkinson's disease                                                                                                                                                                          |
| Martin et al., 2008 <sup>20</sup>   | NM                                                                                                                                                                                                                                                                                                                                              | Free of neurologic or psychiatric disease                                                                                                                                                    |
| Du et al., 2012 <sup>21</sup>       | NM                                                                                                                                                                                                                                                                                                                                              | NM                                                                                                                                                                                           |
| Bunzeck et al., 2013 <sup>22</sup>  | No psychiatric or neurological disorders other than PD                                                                                                                                                                                                                                                                                          | No history of neurological, psychiatric or medical disorders or any current medical problems                                                                                                 |
| Lee et al., 2013 <sup>23</sup>      | No microvascular lesions found on brain MRI                                                                                                                                                                                                                                                                                                     | No neurologic or psychiatric disease                                                                                                                                                         |
| Lewis et al., 2013 <sup>3</sup>     | Free of major acute medical issues such as liver, kidney or thyroid abnormalities, or deficiencies of B12 or folate.                                                                                                                                                                                                                            | NM                                                                                                                                                                                           |
| Rossi et al., 2013 <sup>24</sup>    | Exclusion criteria: Alzheimer's disease or any other type of dementia that was diagnosed within 1 year preceding the study; alcohol or drug addiction; pregnancy, severe general illnesses such as cardiac, lung, or gastrointestinal disease; liver or kidney malfunction; active malignant neoplasm; and neurological or psychiatric disease. | Hospital employees and the patients' spouses: the inclusion criterion was a clinical examination with no abnormal findings. The exclusion criterion was a history of cerebrovascular attack. |
| Ulla et al., 2013 <sup>25</sup>     | NM                                                                                                                                                                                                                                                                                                                                              | No neurologic or psychiatric disease                                                                                                                                                         |
| Rossi et al., 2014 <sup>26</sup>    | Exclusion criteria: presence of Alzheimer's disease or other dementia; other severe disease such as heart, lung, or gastrointestinal disease; hypofunction of liver or kidney; active cancer; neurological or psychiatric disease; a history of cerebrovascular attack; contraindications for MRI; alcohol or drug addiction; and pregnancy.    | A clinical neurological examination with no abnormal findings                                                                                                                                |
| Barbosa et al., 2015 <sup>27</sup>  | No history of other neurological and psychiatric disorders                                                                                                                                                                                                                                                                                      | No history of neurological disease, hypertension or diabetes                                                                                                                                 |
| Murakami et al., 2015 <sup>30</sup> | NM                                                                                                                                                                                                                                                                                                                                              | No history of neurologic or psychiatric diseases                                                                                                                                             |
| He et al., 2015 <sup>29</sup>       | No presence of dementia; no other neurological or psychiatric disorders                                                                                                                                                                                                                                                                         | NM                                                                                                                                                                                           |
| Du et al., 2016 <sup>28</sup>       | No history of neurological or psychiatric disease other than PD                                                                                                                                                                                                                                                                                 | No neurologic or psychiatric disease                                                                                                                                                         |
| Zhang et al., 2010 <sup>34</sup>    | Without dementia, no history of neurologic or psychiatric disease and neurologic sequelae induced by brain trauma                                                                                                                                                                                                                               | Hospital staff and local community                                                                                                                                                           |
| Jin et al., 2011 <sup>35</sup>      | Exclusion criteria: signs of upper and/or lower motor neuron dysfunction; orthostatic hypotension within three years of PD onset; cognitive impairment as assessed by the Mini-Mental State Examination; hepatic and/or renal dysfunction.                                                                                                      | No history of neurologic/psychiatric disorders and no abnormal signal in structural magnetic resonance imaging.                                                                              |

|                                   |    |                                                                                                                                 |
|-----------------------------------|----|---------------------------------------------------------------------------------------------------------------------------------|
| Wang et al., 2011 <sup>32</sup>   | NM | No abnormal signal in MRI examination; no history of central nervous system disease; no drug abuse, smoking and alcohol history |
| Wang et al., 2012 <sup>37</sup>   | NM | NM                                                                                                                              |
| Han et al., 2013 <sup>31</sup>    | NM | No neurologic or psychiatric disease                                                                                            |
| Kim et al., 2014 <sup>36</sup>    | NM | NM                                                                                                                              |
| Wu, et al., 2014 <sup>33</sup>    | NM | NM                                                                                                                              |
| Huang, et al., 2010 <sup>38</sup> | NM | Healthy volunteers                                                                                                              |

NM, not mentioned. The numbers in parenthesis indicate ‘n’ for each comorbidity.

(A) Nucleus caudatus

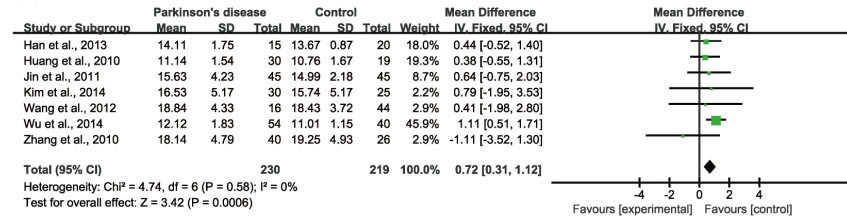

(B) Globus pallidus

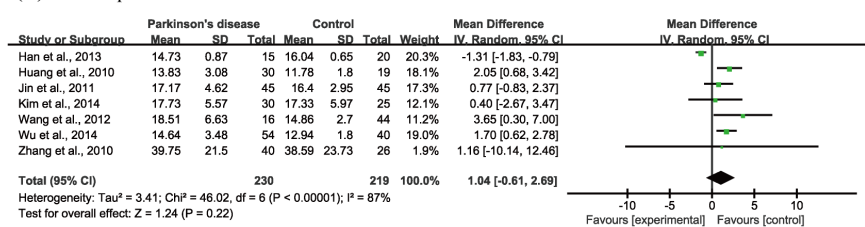

(C) Globus pallidus\*

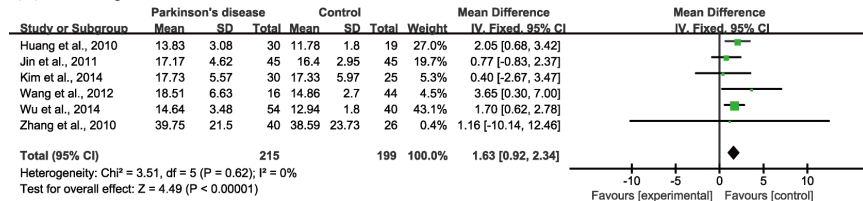

(D) Substantia nigra

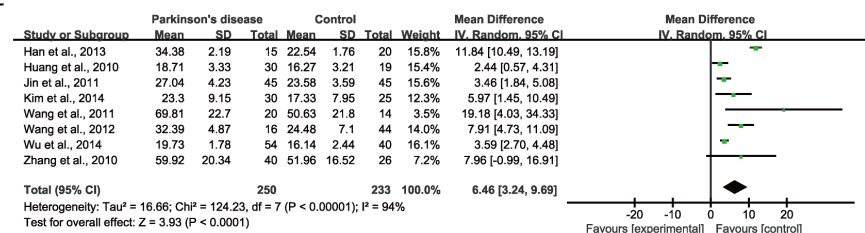

(E) Putamen

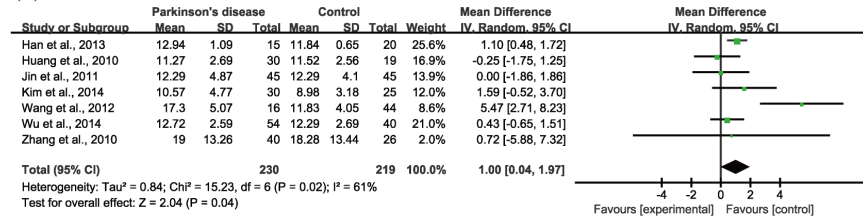

(F) Putamen\*

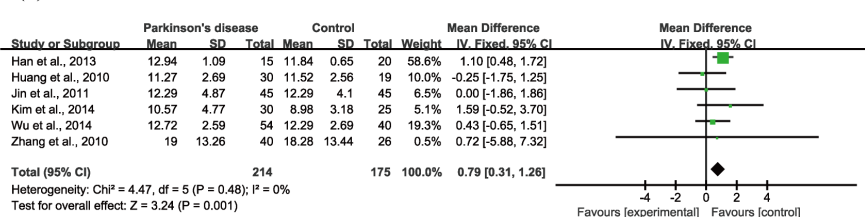

(G) Thalamus

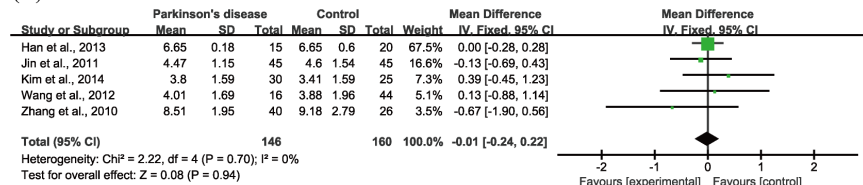

(H) Red nucleus

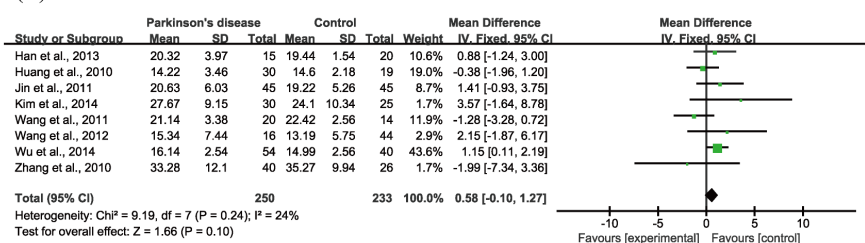

**Figure S1.** Statistical summaries and forest plots of studies comparing iron concentrations between PD patients and controls by SWI relaxometry. B, D and E, pooled using random-effects models. The others were pooled using fixed-effects models. \*, analyzed after heterogeneity was removed.

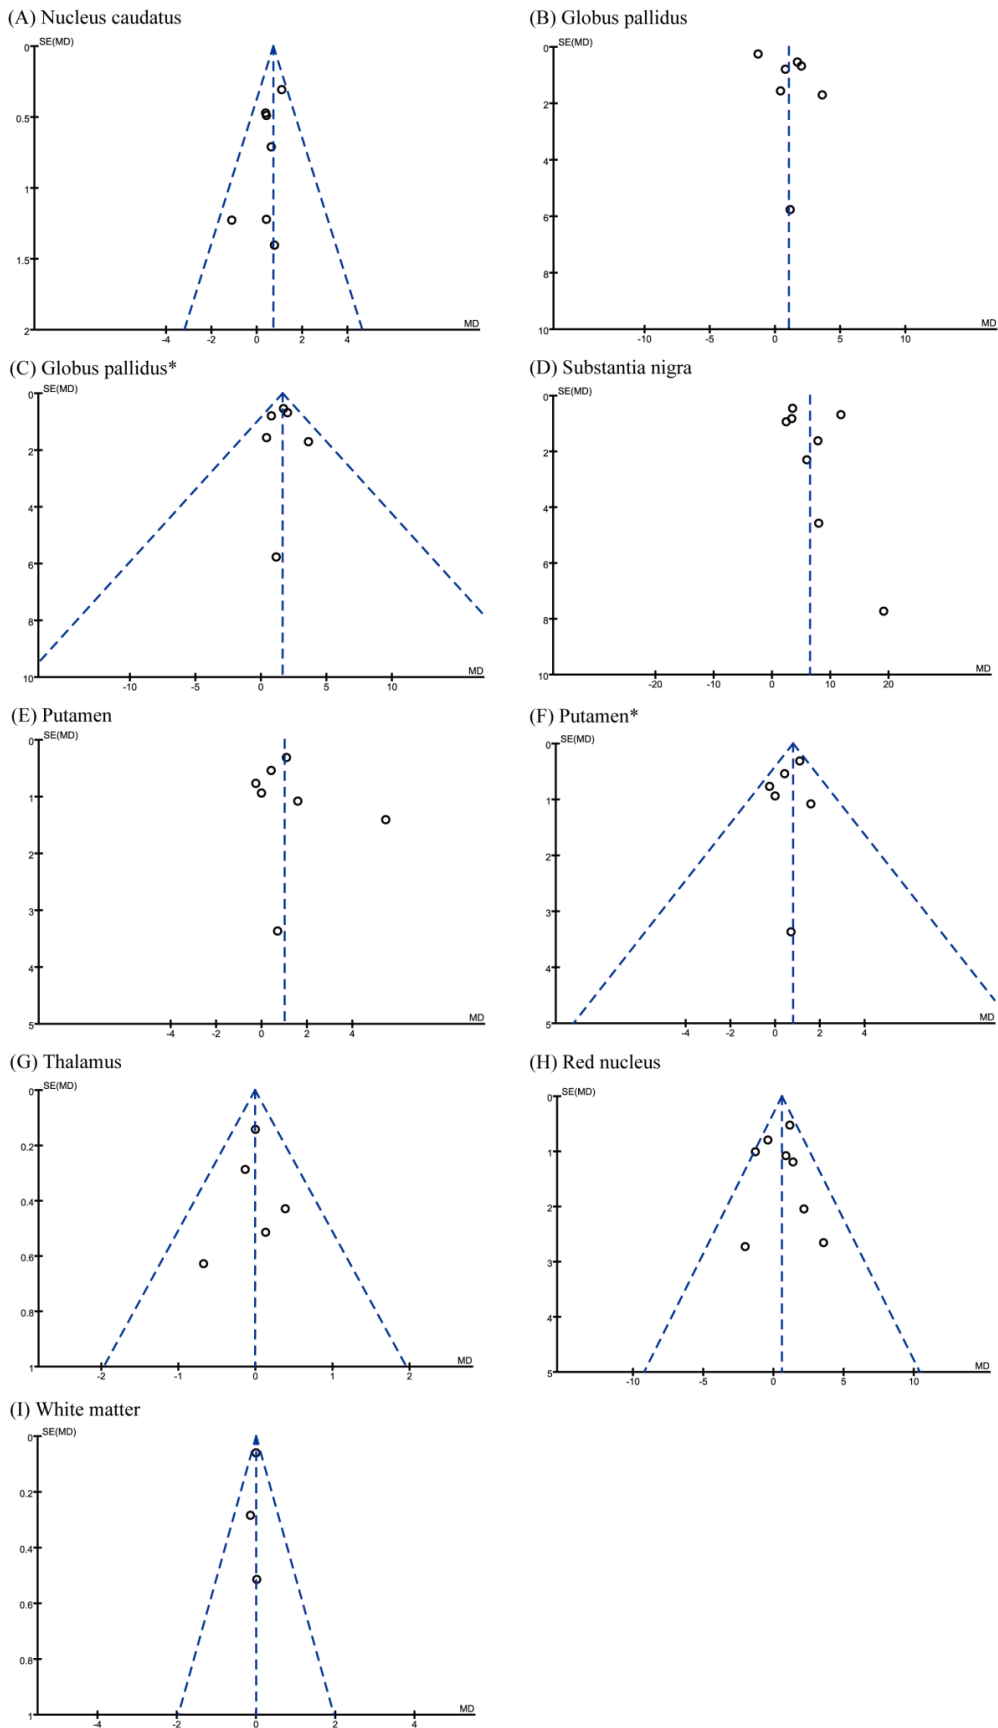

**Figure S2.** Funnel plots that examine possible publication bias in the studies by SWI. \*, analyzed after heterogeneity was removed.
